# Supplementary material
Source: PubMed Central journal article supplement (PMC7392842)
Supplement: bloodBLD2019003639-suppl1.pdf [file bloodBLD2019003639-suppl1.pdf]

**Bleeding and Response to Hemostatic Therapy in Acquired Hemophilia A (AHA):  
Results from the GTH-AH 01/2010 Study**

**Authors and affiliations**

Katharina Holstein,<sup>1</sup> Xiaofei Liu,<sup>2</sup> Andrea Smith,<sup>2</sup> Paul Knöbl,<sup>3</sup> Robert Klamroth,<sup>4</sup> Ulrich Geisen,<sup>5</sup> Hermann Eichler,<sup>6</sup> Wolfgang Miesbach,<sup>7</sup> Andreas Tiede<sup>8</sup>

- 1 Hematology and Oncology, University Medical Center Hamburg-Eppendorf, Hamburg, Germany
- 2 Biometry, Hannover Medical School, Hannover, Germany
- 3 Hematology and Hemostasis, Vienna Medical University, Vienna, Austria
- 4 Internal Medicine, Vivantes Clinic Friedrichshain, Berlin, Germany
- 5 Institute for Clinical Chemistry and Laboratory Medicine, Medical Center - University of Freiburg, Faculty of Medicine, University of Freiburg, Germany
- 6 Institute of Clinical Hemostaseology and Transfusion Medicine, Saarland University and Saarland University Hospital, Homburg/Saar, Germany
- 7 Medical Clinic II, Institute of Transfusion Medicine, Goethe University, Frankfurt, Germany
- 8 Hematology, Hemostasis, Oncology, and Stem Cell Transplantation, Hannover Medical School, Hannover, Germany

**Correspondence**

Andreas Tiede (MD, PhD), Hannover Medical School, Department of Hematology, Hemostasis, Oncology and Stem Cell Transplantation, Carl Neuberg Str. 1, 30625 Hannover, Germany, tel.: + 49-511-532-6287, fax: + 49-511-532-4146, email: [tiede.andreas@mh-hannover.de](mailto:tiede.andreas@mh-hannover.de)

**Study sites and investigators**

| Country and city<br>(alphabetical) | Institution                                                 | Investigators                                                  |
|------------------------------------|-------------------------------------------------------------|----------------------------------------------------------------|
| <b>Austria</b>                     |                                                             |                                                                |
| Feldkirchen                        | Landeskrankenhaus                                           | Alois Lang                                                     |
| Graz                               | Graz Medical University                                     | Peter Neumeister                                               |
| Salzburg                           | Paracelsus Medical University                               | Richard Greil                                                  |
| Vienna                             | Vienna Medical University                                   | Paul Knöbl                                                     |
| <b>Germany</b>                     |                                                             |                                                                |
| Berlin                             | Vivantes Hospital Friedrichshain                            | Robert Klamroth, Saskia Gottstein                              |
| Berlin                             | Charité University Hospital                                 | Ulrich Kalus                                                   |
| Bielefeld                          | Evangelic Hospital                                          | Klaus Leimkühler                                               |
| Bonn                               | University Hospital                                         | Johannes Oldenburg, Natascha Marquardt                         |
| Dresden                            | University Hospital                                         | Uwe Platzbecker                                                |
| Düsseldorf                         | Heinrich Heine University                                   | Rüdiger E. Scharf, Barbara Bomke                               |
| Frankfurt                          | Johann Wolfgang Goethe University Hospital                  | Wolfgang Miesbach                                              |
| Freiburg                           | University Hospital                                         | Ulrich Geisen, Jürgen Heinz                                    |
| Görlitz                            | Städtisches Klinikum                                        | Kerstin Gutsche                                                |
| Hamburg                            | Eppendorf University Hospital                               | Katharina Holstein                                             |
| Hannover                           | Hannover Medical School                                     | Andreas Tiede, Christiane Dobbstein                            |
| Heidelberg                         | SRH Kurpfalzkrankenhaus                                     | Angela Huth-Kühne, Peter Staritz                               |
| Homburg/S.                         | Saarland University Hospital                                | Hermann Eichler, Joachim Schenk, Jürgen Groß, Bernhard Stephan |
| Jena                               | University Hospital                                         | Kristina Schilling                                             |
| Kiel                               | University Hospital Center Schleswig-Holstein, Campus Kiel  | Ralf-Ulrich Trappe                                             |
| Leipzig                            | Center of Coagulation Disorders, and St. Georg Hospital     | Ute Scholz, Karin Liebscher                                    |
| Lübeck                             | University Medical Center Schleswig-Holstein, Campus Lübeck | Ulrike Nowak-Göttl, Daniela Manner                             |
| Mainz                              | University Hospital                                         | Inge Scharrer, Charis von Auer                                 |
| Munich                             | Großhadern University Hospital                              | Michael Spannagl                                               |
| Münster                            | Hemophilia Care Center                                      | Hartmut Pollmann                                               |
| Ravensburg                         | Oberschwabenklinik                                          | Andreas Keßler                                                 |
| Regensburg                         | University Hospital                                         | Stephanie Meyer                                                |
| Ulm                                | University Hospital                                         | Sabine Struve                                                  |
| Wiesbaden                          | German Diagnostic Clinic                                    | Manuela Krause                                                 |
| Würzburg                           | University Hospital                                         | Udo Steigerwald                                                |

**Table S1: Fatal bleeds**

| Patient | Location                    | Bleed start    | Day of death | Cause of death      |
|---------|-----------------------------|----------------|--------------|---------------------|
| 003-04  | Upper extremity, fasciotomy | Day 1 and Day6 | Day 7        | Bleeding, Infection |
| 006-07  | Tongue and throat           | Day 15         | Day 23       | Aspiration          |
| 019-02  | Intracranial                | Day 26         | Day 43       | Cerebral oedema     |

**Table S2: Factors influencing the rate of new bleeds, limited to those treated with bypassing agents or factor VIII concentrates, after day 1**

| Parameter                        | Adjusted IRR (95% CI) | P value |
|----------------------------------|-----------------------|---------|
| <b>FVIII activity category</b>   |                       |         |
| <1%                              | 7.3 (2.2-25)          | 0.0015  |
| 1-<5%                            | 9.1 (2.7-30)          | 0.0003  |
| 5-<20%                           | 8.3 (2.6-26)          | 0.0003  |
| 20-<50%                          | 6.3 (2.0-20)          | 0.0014  |
| ≥50%                             | 1                     |         |
| <b>WHO performance status</b>    |                       |         |
| 0 (best)                         | 0.24 (0.07-0.86)      | 0.0280  |
| 1                                | 0.62 (0.25-1.55)      | 0.3067  |
| 2                                | 0.52 (0.19-1.40)      | 0.1976  |
| 3                                | 0.75 (0.30-1.89)      | 0.5411  |
| 4 or 5 (worst)                   | 1                     |         |
| <b>Other baseline conditions</b> |                       |         |
| Renal insufficiency              | 1.74 (0.93-3.27)      | 0.0832  |
| Diabetes mellitus                | 1.09 (0.56-2.11)      | 0.7993  |
| <b>Time (per week)</b>           | 0.72 (0.62-0.83)      | <0.0001 |

Adjusted incidence rate ratios (IRR) from generalized linear mixed model of weekly bleeding rate (dependent variable, utilizing negative binomial distribution and log link function) with indicated parameters. Only treated bleeds were considered instead of all bleeds (compare Table 2 of the main paper). Abbreviations: IRR, incidence rate ratio; WHO, World Health Organization.

**Table S3: First line dosing information on 48 bleeds treated with rFVIIa**

|                                                      | Severe<br>N = 26 | Non-severe<br>N=22 | P       |
|------------------------------------------------------|------------------|--------------------|---------|
| Starting dose in $\mu\text{g}/\text{kg}$ – mean (SD) | 95.8 (20.1)      | 85.4 (13.5)        | 0.0448* |
| Dosing interval – n (%)                              |                  |                    | 0.0092‡ |
| 2 h                                                  | 6                | 1                  |         |
| 3 h                                                  | 9                | 5                  |         |
| 4 h                                                  | 6                | 5                  |         |
| 8 h                                                  | -                | 3                  |         |
| 12 h                                                 | 3                | 2                  |         |
| 24 h                                                 | 2                | -                  |         |
| Single dose only                                     | -                | 6                  |         |

This analysis comprises all bleeds, to which rFVIIa dosing information could be unambiguously assigned. Bleeding events with multiple simultaneous bleeds or overlapping bleeding events were excluded.

\* Unpaired t test

‡ Chi square test for trend

**Table S4: Hemostatic treatment information: patient level**

Doses are for: rFVIIa in mg; APCC in units; hFVIII in international units; fibrinogen concentrate (fbg.) in g; fresh frozen plasma (FFP), packed red blood cells (PRBC) and platelet concentrates (PC) in units; tranexamic acid (TXA) in mg.

| ID No. | Body weight | Total bleeds | rFVIIa | APCC   | hFVIII | FFP | Fbg. | PRBC | PC | TXA   |
|--------|-------------|--------------|--------|--------|--------|-----|------|------|----|-------|
| 1      | 85          | 1            | 7      |        |        |     |      |      |    |       |
| 2      | 66          | 1            |        |        |        |     |      |      |    |       |
| 3      | 69          | 2            | 26     |        | 5000   |     |      | 8    |    | 15000 |
| 4      | 82          | 4            | 2555   | 340000 |        |     |      | 24   |    |       |
| 5      | 48          | 5            | 610    |        |        |     |      | 32   |    |       |
| 6      | 70          | 4            |        |        |        |     |      |      |    |       |
| 7      | 69          | 4            | 1208   |        |        |     |      | 29   |    | 12000 |
| 8      | 95          | 4            | 491    | 495000 |        |     |      | 74   |    |       |
| 9      | 70          | 3            | 686    | 204000 |        |     |      | 24   |    |       |
| 10     | 80          | 2            | 917    |        |        |     |      |      |    |       |
| 11     | 71          | 1            |        |        |        |     |      | 1    |    |       |
| 12     | 70          | 0            |        |        |        |     |      |      |    |       |
| 13     | 96          | 2            | 56     | 101000 |        |     |      |      |    |       |
| 14     | 75          | 2            | 120    |        |        |     |      |      |    |       |
| 15     | 90          | 4            | 1168   |        |        |     |      |      |    |       |
| 16     | 95          | 1            | 384    |        |        |     |      |      |    |       |
| 17     | 60          | 0            |        |        |        |     |      |      |    | 28000 |
| 18     | 71          | 3            | 14     |        |        |     |      |      |    | 45000 |
| 19     | NR          | 0            |        |        |        |     |      |      |    |       |
| 20     | 50          | 3            | 25     |        |        |     |      |      |    |       |
| 21     | 80          | 8            | 14     | 4000   |        |     |      |      |    |       |
| 22     | 76          | 3            | 56     |        |        |     |      |      |    |       |
| 23     | 76          | 1            |        |        |        |     |      |      |    |       |
| 24     | 79          | 2            |        |        |        |     |      |      |    |       |
| 25     | 55          | 1            | 80     | 86000  |        |     |      |      |    |       |
| 26     | 83          | 4            |        | 62000  |        |     |      |      |    | 60000 |
| 27     | 80          | 1            | 80     |        |        |     |      |      |    | 4000  |
| 28     | 75          | 0            |        |        |        |     |      |      |    | 25250 |
| 29     | 66          | 1            |        | 63000  |        |     |      | 16   |    |       |
| 30     | 70          | 3            | 104    |        |        |     |      |      |    | 76000 |
| 31     | 66          | 1            |        |        |        |     |      | 4    |    |       |
| 32     | 62          | 0            |        |        |        |     |      | 4    |    |       |
| 33     | 46          | 1            | 8      | 9000   |        |     |      | 1    |    |       |
| 34     | 82          | 2            | 91     | 9000   | 133000 |     |      | 13   |    |       |
| 35     | 60          | 5            | 265    | 27000  | 107000 |     |      | 88   |    |       |
| 36     | 72          | 2            |        |        | 10000  |     |      |      |    |       |
| 37     | 80          | 1            | 168    |        | 45000  |     |      | 4    |    |       |
| 38     | 62          | 4            | 695    |        | 580000 |     |      | 16   |    |       |
| 39     | 31          | 3            | 5      | 102000 | 35000  |     | 52   | 52   | 2  | 42000 |
| 40     | 64          | 3            | 315    | 48000  | 36000  |     |      | 44   |    |       |
| 41     | 77          | 1            |        | 66000  |        |     |      |      |    |       |
| 42     | 51          | 1            |        | 3000   | 44000  |     |      |      |    |       |
| 43     | 80          | 0            |        |        |        |     |      |      |    |       |
| 44     | 64          | 1            | 54     |        | 140000 |     |      |      |    |       |
| 45     | 71          | 2            | 36     |        | 33000  |     |      | 4    |    |       |
| 46     | 70          | 2            | 25     |        |        |     |      | 12   |    | 72000 |
| 47     | 88          | 1            |        |        |        |     |      |      |    |       |
| 48     | 72          | 1            | 172    |        |        |     |      | 4    |    |       |
| 49     | 72          | 1            | 820    |        | 2000   | 16  |      | 86   | 20 |       |
| 50     | 115         | 8            |        |        |        |     |      |      |    |       |
| 51     | 99          | 5            | 195    |        |        |     |      | 8    |    | 16500 |
| 52     | 85          | 2            | 467    |        |        |     |      | 65   | 4  |       |
| 53     | 80          | 7            | 19     |        | 18000  |     |      | 2    |    |       |
| 54     | 113         | 9            |        |        |        |     |      |      |    |       |
| 55     | 78          | 4            |        |        |        |     |      |      |    |       |
| 56     | 82          | 2            |        |        |        |     |      |      |    |       |
| 57     | 83          | 3            |        |        |        |     |      |      |    |       |

| ID No. | Body weight | Total bleeds | rFVIIa | APCC   | hFVIII | FFP | Fbg. | PRBC | PC | TXA    |
|--------|-------------|--------------|--------|--------|--------|-----|------|------|----|--------|
| 58     | 85          | 1            |        |        | 202000 |     |      |      |    |        |
| 59     | 90          | 6            |        |        |        |     |      |      |    |        |
| 60     | 77          | 2            | 28     | 68000  |        |     |      |      |    | 18000  |
| 61     | NR          | 3            | 70     |        |        |     |      | 16   |    |        |
| 62     | 85          | 5            | 693    | 28000  |        |     |      | 45   |    |        |
| 63     | 61          | 4            | 197    | 58000  |        |     |      |      |    |        |
| 64     | 78          | 2            |        |        |        |     |      |      |    |        |
| 65     | 100         | 3            | 126    |        |        |     |      |      |    | 54000  |
| 66     | 83          | 4            |        | 302000 |        |     |      |      |    | 24000  |
| 67     | 80          | 2            | 301    |        |        |     |      |      |    | 60000  |
| 68     | 62          | 4            |        |        |        |     |      |      |    | 30000  |
| 69     | 82          | 7            | 296    | 52000  |        |     |      |      |    | 93000  |
| 70     | 65          | 7            | 408    |        |        |     |      | 47   |    | 105000 |
| 71     | 64          | 4            |        |        |        |     |      |      |    | 45000  |
| 72     | 75          | 3            | 90     | 138000 |        |     |      | 391  |    | 28000  |
| 73     | 81          | 6            | 224    |        |        |     |      | 20   |    | 90000  |
| 74     | 70          | 3            |        |        |        |     |      |      |    | 20000  |
| 75     | 84          | 6            | 326    |        |        |     |      |      |    |        |
| 76     | 70          | 8            | 1379   |        |        |     |      | 20   |    | 21000  |
| 77     | 73          | 2            | 133    |        |        |     |      | 4    |    | 13500  |
| 78     | 79          | 2            | 210    |        |        |     |      | 4    |    |        |
| 79     | 74          | 3            | 1420   |        |        |     |      | 25   |    |        |
| 80     | 88          | 1            | 1021   |        |        |     |      | 4    |    |        |
| 81     | 80          | 1            |        |        |        |     |      |      |    | 500    |
| 82     | 85          | 0            | 130    |        |        |     |      | 20   | 12 |        |
| 83     | 85          | 5            | 750    |        |        |     |      | 20   |    |        |
| 84     | NR          | 0            |        |        |        |     |      |      |    |        |
| 85     | 117         | 3            | 460    | 10000  |        |     |      |      |    |        |
| 86     | 105         | 1            | 28     |        |        | 20  |      | 30   |    | 51000  |
| 87     | 80          | 3            | 80     |        |        |     |      |      |    |        |
| 88     | 90          | 1            | 24     |        |        |     |      | 1    |    |        |
| 89     | 72          | 2            |        |        |        |     |      |      |    |        |
| 90     | 100         | 2            | 386    |        |        |     |      | 9    |    |        |
| 91     | 75          | 1            |        |        |        |     |      |      |    |        |
| 92     | 63          | 7            | 372    |        |        |     |      | 6    |    |        |
| 93     | 68          | 4            |        |        |        |     |      |      |    |        |
| 94     | 72          | 1            | 252    |        |        |     |      | 17   |    |        |
| 95     | 98          | 1            | 258    |        | 7000   |     |      | 4    |    |        |
| 96     | 75          | 3            |        |        |        |     |      |      |    |        |
| 97     | 60          | 2            |        |        |        |     |      |      |    | 750    |
| 98     | 112         | 8            | 1120   |        |        |     |      | 12   |    | 260000 |
| 99     | 85          | 7            | 1264   |        |        |     |      | 4    | 1  | 108000 |
| 100    | 66          | 3            | 300    |        |        | 68  |      | 212  | 14 | 28000  |
| 101    | 102         | 0            |        |        |        |     |      |      |    |        |
| 102    | 90          | 4            |        |        |        | 9   |      | 8    |    | 18000  |
